# Supplementary material for: Organic carbon burial by river meandering partially offsets bank erosion carbon fluxes in a discontinuous permafrost floodplain
Source: Copernicus journal article supplement (doi:10.5194/esurf-10-421-2022), 2022-05-10
Supplement: Supplementary file 1 [file esurf-10-421-2022-supplement.zip]

Archive with 5 entries (5 files):
- TableS4.csv
- KoyukukBankCarbon_EsurfTemplate_Supplement_rev1_Final.pdf
- TableS2.csv
- TableS5.csv
- esurf-10-421-2022-supplement-title-page.pdf
