# Supplementary material for: Organic carbon burial by river meandering partially offsets bank erosion carbon fluxes in a discontinuous permafrost floodplain
Source: Copernicus journal article supplement (doi:10.5194/esurf-10-421-2022), 2022-05-10
Supplement: Supplementary file 1 [file esurf-10-421-2022-supplement.zip › esurf-10-421-2022-supplement-title-page.pdf]

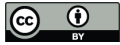

## *Supplement of*

# **Organic carbon burial by river meandering partially offsets bank erosion carbon fluxes in a discontinuous permafrost floodplain**

**Madison M. Douglas et al.**

*Correspondence to:* Madison M. Douglas (mmdougla@caltech.edu)

- esurf-10-421-2022-supplement-title-page.pdf
- KoyukukBankCarbon\_EsurfTemplate\_Supplement\_rev1\_Final.pdf
- TableS2.csv
- TableS4.csv
- TableS5.csv

The copyright of individual parts of the supplement might differ from the article licence.
