# Supplementary material for: Organic carbon burial by river meandering partially offsets bank erosion carbon fluxes in a discontinuous permafrost floodplain
Source: Copernicus journal article supplement (doi:10.5194/esurf-10-421-2022), 2022-05-10
Supplement: Supplementary file 1 [file esurf-10-421-2022-supplement.zip › TableS2.csv]

Sample Name	Sample Site	Depth (cm)	D50 (mm)	Stratigraphic Unit	Water Content (wt%)	Bulk Density (kg/m3)	d13C (‰)	TOC (dry wt%)	TN (dry wt%)	Mass Ratio of TOC:TN	Fraction Modern	Radiocarbon Age (BP)	WHOI TOC (dry wt%)	WHOI d13C (‰)	Cap Delta 14C
KY18-Bank1-Peat*	Bank 1	-	0.009139	peat	-	-	-28.22±0.1	22.27±0.44	1.20±0.08	18.6±1.3	-	-	-	-	-
KY18-Bank1-42	Bank 1	42	-	-	60.4	-	-29.2±0.1	2.30±0.05	0.26±0.02	8.8±0.6	-	-	-	-	-
KY18-Bank1-120	Bank 1	120	0.010685	silt	61.3	-	-	-	-	-	-	-	-	-	-
KY18-Bank2-10*	Bank 2	10	0.033413	silt	45.2	-	-27.3±0.1	3.20±0.06	0.27±0.02	11.9±0.8	1.0471±0.0020	> Modern	5.23±0.26	-27.4	38.57
KY18-Bank2-65	Bank 2	65	-	-	47.1	-	-26.5±0.1	5.30±0.10	0.35±0.02	15.3±1.0	-	-	-	-	-
KY18-Bank2-230*	Bank 2	230	0.111183	sand	13.8	-	-26.7±0.1	0.27±0.01	0.08±0.01	3.2±0.2	0.5029±0.00230	5520±35	0.30±0.02	-18.42	-501.26
KY18-Bank5-153	Bank 5	183	-	-	25.4	-	-26.0±0.1	0.39±0.01	0.08±0.01	4.7±0.3	-	-	-	-	-
KY18-Bank5-240	Bank 5	370	-	-	31.2	-	-26.1±0.1	1.08±0.02	0.14±0.01	7.8±0.5	-	-	-	-	-
KY18-Bank9-Peat*	Bank 9	75	0.047659	peat	80.2	-	-26.5±0.1	43.80±0.86	1.03±0.07	42.4±2.9	0.6202±0.00220	3840±30	32.35±1.62	-26.15	-384.84
KY18-Bank9-220*	Bank 9	200	0.207325	sand	-	-	-27.3±0.1	0.16±0.00	0.05±0.00	3.0±0.2	0.3546±0.00220	8330±50	0.25±0.01	-	-648.28
KY18-Bank9-350*	Bank 9	330	0.154874	sand	22.4	-	-25.8±0.1	0.17±0.00	0.05±0.00	3.3±0.2	0.302±0.00320	9620±85	0.25±0.01	-13.1	-700.48
KY18-Bank9-510*	Bank 9	490	0.052863	silt	40.5	-	-25.5±0.1	5.59±0.11	0.44±0.03	12.6±0.9	-	-	-	-	-
KY18-Core1-22-28*	Core 1	25	0.010101	silt	62.7	1.09	-27.1±0.1	6.45±0.13	0.44±0.03	14.8±1.0	0.9202±0.00180	670±15	6.10±0.31	-26.88	-87.33
KY18-Core1-40-45	Core 1	43	-	-	-	0.82	-27.10±0.1	10.69±0.21	0.71±0.05	15.1±1.0	-	-	-	-	-
KY18-Core1-67-71	Core 1	69	-	-	7.9	2.66	-30.5±0.1	5.61±0.11	0.55±0.04	10.2±0.7	-	-	-	-	-
KY18-Core1-105-111*	Core 1	108	0.010718	silt	54	1.29	-29.6±0.1	3.50±0.07	0.40±0.03	8.8±0.6	0.7358±0.00190	2460±20	3.80±0.19	-29.63	-270.21
KY18-Core2-10-12	Core 2	46	0.018349	silt	47.2	-	-27.2±0.1	2.70±0.07	0.25±0.01	10.7±0.6	1.0478±0.0020	> Modern	4.08±0.20	-28.02	39.26
KY18-Core2-35-37	Core 2	71	0.010470	silt	29.7	-	-26.7±0.1	6.60±0.16	0.39±0.02	16.8±0.9	0.9854±0.0020	120±15	6.74±0.34	-26.3	-22.72
KY18-Core3-15-20	Core 3	17	0.010210	peat	55	0.6	-26.7±0.1	7.10±0.18	0.59±0.03	12.0±0.6	0.9506±0.00190	405±15	11.82±0.59	-27.01	-57.17
KY18-Core3-84-89	Core 3	86	0.030667	silt	54.2	1.3	-26.9±0.1	1.19±0.03	0.14±0.01	8.5±0.5	0.7182±0.0020	2660±20	2.69±0.13	-25.98	-287.64
KY18-Core4-16-20	Core 4	17	0.011100	silt	52.4	0.49	-26.4±0.1	5.34±0.13	0.43±0.02	12.5±0.7	0.9421±0.00190	480±15	7.70±0.39	-26.64	-65.61
KY18-Core4-105-110	Core 4	108	0.014143	silt	61.2	1.04	-27.0±0.1	1.32±0.03	0.15±0.01	8.8±0.5	0.6904±0.00220	2980±25	1.71±0.09	-25.36	-315.29
KY18-Core5-15	Core 5	15	0.022031	topsoil	62.2	-	-26.22±0.1	22.76±1.09	0.77±0.14	29.4±5.7	1.1452±0.0020	> Modern	5.17±0.26	-26.3	135.82
KY18-Core7-0-5*	Core 7	2	0.017669	topsoil	28.4	-	-27.7±0.1	7.74±0.19	0.44±0.02	17.7±0.9	-	-	-	-	-
KY18-Core7-85-95*	Core 7	90	0.056611	silt	12.8	-	-26.6±0.1	0.56±0.01	0.10±0.00	5.6±0.3	0.6012±0.00230	4090±30	0.64±0.03	-23.92	-403.68
KY18-Core7-390-400*	Core 7	395	0.057561	silt	26.2	-	-26.2±0.1	5.25±0.13	0.36±0.02	14.6±0.8	0.5618±0.00240	4630±35	0.71±0.04	-23.74	-442.79
KY18-Core9-33-38*	Core 9	35	0.051129	peat	87.5	0.94	-26.8±0.1	41.07±1.01	0.98±0.05	41.9±2.2	0.9811±0.0020	155±15	44.11±2.21	-26.65	-26.97
KY18-Core9-90-97*	Core 9	95	0.016947	peat	94.9	0.87	-27.20±0.1	20.73±0.51	1.09±0.05	19.0±1.0	-	-	-	-	-
KY18-Core9-169-174*	Core 9	172	0.028044	silt	65.3	1.11	-27.6±0.1	4.04±0.10	0.25±0.01	16.0±0.9	0.4291±0.00170	6800±30	4.65±0.23	-27.1	-574.37
KY18-Pit1-5	Pit 1	5	0.216314	sand	-	-	-27.3±0.1	0.99±0.02	0.10±0.00	10.0±0.5	0.6459±0.0020	3510±25	0.50±0.03	-25.24	-359.43
KY18-Pit2-10*	Pit 2	10	0.070664	sand	-	-	-27.3±0.1	2.88±0.07	0.22±0.01	13.2±0.7	0.8175±0.00240	1620±25	3.30±0.17	-26.48	-189.16
KY18-Pit4-20	Pit 4	20	0.080758	sand	-	-	-27.5±0.1	1.08±0.03	0.13±0.01	8.6±0.5	0.6828±0.00170	3070±20	0.78±0.04	-25.53	-322.82
KY18-Pit5-20*	Pit 5	20	0.024262	silt	-	-	-26.8±0.1	1.46±0.04	0.18±0.01	8.3±0.4	0.8405±0.00160	1400±15	1.68±0.08	-26.43	-166.43
KY18-Pit6-60*	Pit 6	60	0.090390	sand	-	-	-27.4±0.1	1.05±0.03	0.12±0.01	9.0±0.5	0.7484±0.00150	2330±15	0.92±0.05	-25.59	-257.75
KY18-Pit8-40*	Pit 8	40	0.032250	silt	-	-	-26.6±0.1	1.10±0.03	0.14±0.01	7.7±0.4	0.6606±0.00160	3330±20	1.44±0.07	-25.29	-344.84
KY18-Bank3-101	Bank 3	101	-	woody debris	-	-	-	-	-	-	0.9773±0.00240	185±20	56.70±2.84	-	-30.69
KY18-Bank4-240	Bank 4	240	-	woody debris	-	-	-	-	-	-	0.5991±0.00180	4120±25	50.08±2.50	-	-405.84
KY18-Bank5-175	Bank 5	305	-	woody debris	-	-	-	-	-	-	0.5945±0.00180	4180±25	50.74±2.54	-	-410.36
KY18-Bank5-240	Bank 5	370	-	woody debris	-	-	-	-	-	-	0.5996±0.00150	4110±20	45.79±2.29	-	-405.28
KY18-Bank6-155	Bank 6	155	-	woody debris	-	-	-	-	-	-	0.6354±0.00150	3640±20	54.11±2.71	-	-369.82
KY18-Bank8-60	Bank 8	40	-	woody debris	-	-	-	-	-	-	0.9843±0.00270	125±20	54.17±2.71	-	-23.72
KY18-Bank8-250	Bank 8	250	-	woody debris	-	-	-	-	-	-	0.9685±0.00420	255±35	31.72±1.59	-	-39.41
KY18-Bank12-140	Bank 12	140	-	woody debris	-	-	-	-	-	-	0.9553±0.0020	365±15	52.33±2.62	-	-52.49
KY18-Bank14	Bank 14	-	-	woody debris	-	-	-	-	-	-	0.2319±0.00150	11750±55	48.88±2.44	-	-770.04
KY18-Core4-80	Core 4	80	-	woody debris	-	-	-	-	-	-	0.9305±0.00190	580±15	54.21±2.71	-	-77.08
