# Supplementary material for: Organic carbon burial by river meandering partially offsets bank erosion carbon fluxes in a discontinuous permafrost floodplain
Source: Copernicus journal article supplement (doi:10.5194/esurf-10-421-2022), 2022-05-10
Supplement: Supplementary file 1 [file esurf-10-421-2022-supplement.zip › TableS4.csv]

	Measured Section					Section Total Organic Carbon Stock Calculation					Total Organic Carbon Stocks
Location	Topsoil (m)	Peat (m)	Silt (m)	Sand (m)	Unknown (m)	Topsoil (kgC/m2)	Peat (kgC/m2)	Silt (kgC/m2)	Sand (kgC/m2)	Unknown Section (kgC/m2)	TOC (kgC/m2)
Bank 2	0.2	0	1.3	1.2	9.7	11.2±8.4	0.0±0.0	24.9±18.8	9.0±9.9	72.7±80.2	117.7±83.4
Bank 3	0.5	0	1	0	10.9	28.0±21.1	0.0±0.0	19.1±14.4	0.0±0.0	81.6±90.2	128.7±93.7
Bank 4	0	0.2	0.41	1.9	9.89	0.0±0.0	8.5±4.0	7.8±5.9	14.2±15.7	74.1±81.8	104.7±83.6
Bank 5	0	1.3	0.53	0.7	9.87	0.0±0.0	55.5±26.0	10.1±7.7	5.2±5.8	73.9±81.7	144.8±86.2
Bank 6	0	1	1.6	1	8.8	0.0±0.0	42.7±20.0	30.6±23.1	7.5±8.3	65.9±72.8	146.7±79.4
Bank 7	0.3	0	2.3	0.5	9.3	16.8±12.7	0.0±0.0	44.0±33.2	3.7±4.1	69.7±76.9	134.2±84.8
Bank 8	0.15	0	1.41	1.04	9.8	8.4±6.3	0.0±0.0	27.0±20.4	7.8±8.6	73.4±81.1	116.6±84.3
Bank 9	0	0.9	0.51	4.39	6.6	0.0±0.0	38.4±18.0	9.8±7.4	32.9±36.3	49.4±54.6	130.5±68.4
Bank 10	0	0.1	2.95	0.25	9.1	0.0±0.0	4.3±2.0	56.4±42.6	1.9±2.1	68.2±75.3	130.7±86.5
Bank 11	0	0.35	1.12	0.28	10.65	0.0±0.0	14.9±7.0	21.4±16.2	2.1±2.3	79.8±88.1	118.2±89.9
Bank 13	0	0	1.1	0	11.3	0.0±0.0	0.0±0.0	21.0±15.9	0.0±0.0	84.6±93.5	105.7±94.8
Core1	0	0.5	2	0	9.9	0.0±0.0	21.3±10.0	38.3±28.9	0.0±0.0	74.2±81.9	133.8±87.4
Core2	0.15	0	1.25	0	11	8.4±6.3	0.0±0.0	23.9±18.0	0.0±0.0	82.4±91.0	114.7±93.0
Core3	0	0.26	0.67	0	11.47	0.0±0.0	11.1±5.2	12.8±9.7	0.0±0.0	85.9±94.9	109.8±95.5
Core4	0	0.2	1.02	0	11.18	0.0±0.0	8.5±4.0	19.5±14.7	0.0±0.0	83.7±92.5	111.8±93.7
Core5	0.15	0	1.02	0	11.23	8.4±6.3	0.0±0.0	19.5±14.7	0.0±0.0	84.1±92.9	112.0±94.3
Core6	0	0.1	1.18	0	11.12	0.0±0.0	4.3±2.0	22.6±17.0	0.0±0.0	83.3±92.0	110.1±93.6
Core7	0.05	0	3.45	0.4	8.5	2.8±2.1	0.0±0.0	66.0±49.8	3.0±3.3	63.7±70.3	135.5±86.3
Core8	0	1.1	0	0.54	10.76	0.0±0.0	46.9±22.0	0.0±0.0	4.0±4.5	80.6±89.0	131.6±91.8
Core9	0	1.3	0.49	0	10.61	0.0±0.0	55.5±26.0	9.4±7.1	0.0±0.0	79.5±87.8	144.3±91.8
Pit 6	0	0	0.41	0.7	11.29	0.0±0.0	0.0±0.0	7.8±5.9	5.2±5.8	84.6±93.4	97.7±93.8
Pit 7	0.17	0	0.67	0	11.56	9.5±7.2	0.0±0.0	12.8±9.7	0.0±0.0	86.6±95.6	108.9±96.4
Pit 8	0.05	0	1.3	0	11.05	2.8±2.1	0.0±0.0	24.9±18.8	0.0±0.0	82.8±91.4	110.4±93.3
Pit 10	0.15	0	1.05	0	11.2	8.4±6.3	0.0±0.0	20.1±15.2	0.0±0.0	83.9±92.7	112.4±94.1
