# Supplementary material for: Organic carbon burial by river meandering partially offsets bank erosion carbon fluxes in a discontinuous permafrost floodplain
Source: Copernicus journal article supplement (doi:10.5194/esurf-10-421-2022), 2022-05-10
Supplement: Supplementary file 1 [file esurf-10-421-2022-supplement.zip › TableS5.csv]

Sample Name	D10 (µm)	D50 (µm)	D90 (µm)	0.02µm-0.02µm	0.03µm-0.04µm	0.04µm-0.05µm	0.05µm-0.06µm	0.06µm-0.07µm	0.07µm-0.08µm	0.08µm-0.09µm	0.09µm-0.10µm	0.10µm-0.11µm	0.11µm-0.13µm	0.13µm-0.14µm	0.14µm-0.16µm	0.16µm-0.18µm	0.18µm-0.20µm	0.20µm-0.22µm	0.22µm-0.25µm	0.25µm-0.28µm	0.28µm-0.32µm	0.32µm-0.35µm	0.36µm-0.40µm	0.40µm-0.45µm	0.45µm-0.50µm	0.50µm-0.56µm	0.56µm-0.63µm	0.63µm-0.71µm	0.71µm-0.80µm	0.80µm-0.89µm	0.89µm-1.00µm	1.00µm-1.26µm	1.26µm-1.42µm	1.42µm-1.59µm	1.59µm-1.78µm	1.78µm-2.00µm	2.00µm-2.24µm	2.24µm-2.52µm	2.52µm-2.82µm	2.83µm-3.17µm	3.17µm-3.56µm	3.56µm-3.90µm	3.90µm-4.48µm	4.48µm-5.02µm	5.02µm-5.64µm	5.64µm-6.32µm	6.33µm-7.09µm	7.10µm-7.79µm	7.80µm-8.93µm
KY18-Bank1-Peat	3.250	9.139	29.218	0.000	0.000	0.000	0.000	0.000	0.000	0.000	0.000	0.000	0.000	0.000	0.000	0.000	0.000	0.000	0.000	0.000	0.000	0.000	0.000	0.000	0.000	0.000	0.000	0.000	0.000	0.000	0.000	0.000	0.000	0.186	0.516	0.886	5.123	0.253	0.000	4.942	0.191	0.000	4.691	0.157	0.000	3.707	0.089	0.000	4.686
KY18-Bank1-120	3.980	10.685	31.831	0.000	0.000	0.000	0.000	0.000	0.000	0.000	0.000	0.000	0.000	0.000	0.000	0.000	0.000	0.000	0.000	0.000	0.000	0.000	0.000	0.000	0.000	0.000	0.000	0.000	0.000	0.000	0.000	0.000	0.000	0.018	0.151	0.399	5.731	0.070	0.128	5.658	0.046	0.035	5.470	0.032	0.000	4.374	0.008	0.000	5.570
KY18-Bank2-10	6.634	33.413	109.770	0.000	0.000	0.000	0.000	0.000	0.000	0.000	0.000	0.000	0.000	0.000	0.000	0.000	0.000	0.000	0.000	0.000	0.000	0.000	0.000	0.000	0.000	0.000	0.000	0.000	0.000	0.000	0.000	0.000	0.000	0.000	0.086	0.178	0.332	0.449	0.576	0.708	0.835	0.762	1.299	1.231	1.363	1.498	1.634	1.430	2.252
KY18-Bank2-230	14.083	111.183	234.000	0.000	0.000	0.000	0.000	0.000	0.000	0.000	0.000	0.000	0.000	0.000	0.000	0.000	0.000	0.000	0.000	0.000	0.000	0.000	0.000	0.000	0.000	0.000	0.000	0.000	0.000	0.000	0.000	0.000	0.000	0.000	0.040	0.082	0.148	0.195	0.243	0.292	0.337	0.303	0.512	0.485	0.541	0.603	0.671	0.598	0.961
KY18-Bank9-Peat	12.774	47.659	181.656	0.000	0.000	0.000	0.000	0.000	0.000	0.000	0.000	0.000	0.000	0.000	0.000	0.000	0.000	0.000	0.000	0.000	0.000	0.000	0.000	0.000	0.000	0.000	0.000	0.000	0.000	0.000	0.000	0.000	0.000	0.000	0.000	0.043	0.133	0.199	0.260	0.315	0.369	0.332	0.556	0.518	0.569	0.626	0.692	0.620	1.023
KY18-Bank9-220	93.454	207.325	408.920	0.000	0.000	0.000	0.000	0.000	0.000	0.000	0.000	0.000	0.000	0.000	0.000	0.000	0.000	0.000	0.000	0.000	0.000	0.000	0.000	0.000	0.000	0.000	0.000	0.000	0.000	0.000	0.000	0.000	0.000	0.000	0.000	0.000	0.007	0.073	0.087	0.104	0.115	0.099	0.156	0.136	0.139	0.143	0.147	0.125	0.196
KY18-Bank9-350	67.472	154.874	323.503	0.000	0.000	0.000	0.000	0.000	0.000	0.000	0.000	0.000	0.000	0.000	0.000	0.000	0.000	0.000	0.000	0.000	0.000	0.000	0.000	0.000	0.000	0.000	0.000	0.000	0.000	0.000	0.000	0.000	0.000	0.000	0.000	0.018	0.062	0.075	0.090	0.100	0.107	0.089	0.139	0.123	0.133	0.147	0.168	0.157	0.272
KY18-Bank9-510	9.266	52.863	224.783	0.000	0.000	0.000	0.000	0.000	0.000	0.000	0.000	0.000	0.000	0.000	0.000	0.000	0.000	0.000	0.000	0.000	0.000	0.000	0.000	0.000	0.000	0.000	0.000	0.000	0.000	0.000	0.000	0.000	0.000	0.073	0.132	0.223	1.444	3.390	0.000	1.604	2.974	0.000	1.786	3.311	0.000	1.657	2.842	0.000	2.523
KY18-Core1-22-28	3.669	10.101	27.688	0.000	0.000	0.000	0.000	0.000	0.000	0.000	0.000	0.000	0.000	0.000	0.000	0.000	0.000	0.000	0.000	0.000	0.000	0.000	0.000	0.000	0.000	0.000	0.000	0.000	0.000	0.000	0.000	0.000	0.000	0.049	0.259	0.606	0.900	1.259	1.635	2.044	2.467	2.291	3.969	3.805	4.228	4.628	4.979	4.262	6.465
KY18-Core1-105-111	3.582	10.718	46.594	0.000	0.000	0.000	0.000	0.000	0.000	0.000	0.000	0.000	0.000	0.000	0.000	0.000	0.000	0.000	0.000	0.000	0.000	0.000	0.000	0.000	0.000	0.000	0.000	0.000	0.000	0.000	0.000	0.000	0.008	0.121	0.347	0.705	1.002	1.355	1.711	2.087	2.463	2.246	3.821	3.599	3.942	4.263	4.538	3.856	5.810
KY18-Core2-10-12	5.499	18.349	50.861	0.000	0.000	0.000	0.000	0.000	0.000	0.000	0.000	0.000	0.000	0.000	0.000	0.000	0.000	0.000	0.000	0.000	0.000	0.000	0.000	0.000	0.000	0.000	0.000	0.000	0.000	0.000	0.000	0.000	0.000	0.000	0.090	0.195	0.390	0.541	0.709	0.891	1.077	1.008	1.773	1.746	2.008	2.297	2.609	2.363	3.855
KY18-Core2-35-37	3.501	10.470	51.670	0.000	0.000	0.000	0.000	0.000	0.000	0.000	0.000	0.000	0.000	0.000	0.000	0.000	0.000	0.000	0.000	0.000	0.000	0.000	0.000	0.000	0.000	0.000	0.000	0.000	0.000	0.000	0.000	0.000	0.007	0.111	0.356	0.743	1.059	1.435	1.814	2.211	2.606	2.369	4.011	3.751	4.077	4.366	4.598	3.863	5.740
KY18-Core3-15-20	3.461	10.210	32.934	0.000	0.000	0.000	0.000	0.000	0.000	0.000	0.000	0.000	0.000	0.000	0.000	0.000	0.000	0.000	0.000	0.000	0.000	0.000	0.000	0.000	0.000	0.000	0.000	0.000	0.000	0.000	0.000	0.000	0.008	0.134	0.376	0.762	1.087	1.472	1.860	2.265	2.664	2.418	4.085	3.815	4.141	4.433	4.672	3.933	5.872
KY18-Core3-84-89	6.544	30.667	91.461	0.000	0.000	0.000	0.000	0.000	0.000	0.000	0.000	0.000	0.000	0.000	0.000	0.000	0.000	0.000	0.000	0.000	0.000	0.000	0.000	0.000	0.000	0.000	0.000	0.000	0.000	0.000	0.000	0.000	0.000	0.000	0.092	0.185	0.334	0.446	0.569	0.699	0.828	0.761	1.310	1.259	1.414	1.578	1.747	1.547	2.464
KY18-Core4-16-20	3.868	11.100	31.435	0.000	0.000	0.000	0.000	0.000	0.000	0.000	0.000	0.000	0.000	0.000	0.000	0.000	0.000	0.000	0.000	0.000	0.000	0.000	0.000	0.000	0.000	0.000	0.000	0.000	0.000	0.000	0.000	0.000	0.000	0.000	0.200	0.553	0.796	1.120	1.452	1.812	2.188	2.035	3.537	3.408	3.810	4.203	4.563	3.943	6.053
KY18-Core4-105-111	4.673	14.143	38.648	0.000	0.000	0.000	0.000	0.000	0.000	0.000	0.000	0.000	0.000	0.000	0.000	0.000	0.000	0.000	0.000	0.000	0.000	0.000	0.000	0.000	0.000	0.000	0.000	0.000	0.000	0.000	0.000	0.000	0.000	0.000	0.115	0.336	0.508	0.722	0.946	1.194	1.460	1.379	2.449	2.427	2.794	3.184	3.583	3.202	5.117
KY18-Core5-15	5.408	22.031	81.560	0.000	0.000	0.000	0.000	0.000	0.000	0.000	0.000	0.000	0.000	0.000	0.000	0.000	0.000	0.000	0.000	0.000	0.000	0.000	0.000	0.000	0.000	0.000	0.000	0.000	0.000	0.000	0.000	0.000	0.000	0.000	0.093	0.194	0.373	0.528	0.708	0.910	1.119	1.057	1.866	1.828	2.073	2.322	2.563	2.252	3.533
KY18-Core7-0-5	4.736	17.669	62.986	0.000	0.000	0.000	0.000	0.000	0.000	0.000	0.000	0.000	0.000	0.000	0.000	0.000	0.000	0.000	0.000	0.000	0.000	0.000	0.000	0.000	0.000	0.000	0.000	0.000	0.000	0.000	0.000	0.000	0.000	0.000	0.125	0.354	3.863	0.819	0.077	4.018	0.539	0.029	4.146	0.418	0.000	3.562	0.224	0.000	4.967
KY18-Core7-85-95	9.684	56.611	165.584	0.000	0.000	0.000	0.000	0.000	0.000	0.000	0.000	0.000	0.000	0.000	0.000	0.000	0.000	0.000	0.000	0.000	0.000	0.000	0.000	0.000	0.000	0.000	0.000	0.000	0.000	0.000	0.000	0.000	0.000	0.000	0.044	0.096	0.193	0.261	0.335	0.410	0.483	0.441	0.757	0.727	0.820	0.923	1.036	0.932	1.516
KY18-Core7-390-400	10.422	57.561	135.050	0.000	0.000	0.000	0.000	0.000	0.000	0.000	0.000	0.000	0.000	0.000	0.000	0.000	0.000	0.000	0.000	0.000	0.000	0.000	0.000	0.000	0.000	0.000	0.000	0.000	0.000	0.000	0.000	0.000	0.000	0.000	0.035	0.079	0.163	0.226	0.297	0.374	0.451	0.420	0.732	0.710	0.799	0.889	0.976	0.854	1.334
KY18-Core9-33-38	9.009	51.129	324.342	0.000	0.000	0.000	0.000	0.000	0.000	0.000	0.000	0.000	0.000	0.000	0.000	0.000	0.000	0.000	0.000	0.000	0.000	0.000	0.000	0.000	0.000	0.000	0.000	0.000	0.000	0.000	0.000	0.000	0.000	0.000	0.076	0.149	0.258	0.339	0.425	0.511	0.591	0.529	0.885	0.823	0.897	0.974	1.053	0.918	1.447
KY18-Core9-90-97	5.138	16.947	48.830	0.000	0.000	0.000	0.000	0.000	0.000	0.000	0.000	0.000	0.000	0.000	0.000	0.000	0.000	0.000	0.000	0.000	0.000	0.000	0.000	0.000	0.000	0.000	0.000	0.000	0.000	0.000	0.000	0.000	0.000	0.000	0.102	0.295	4.310	0.390	0.000	4.604	0.235	0.000	4.855	0.169	0.000	4.236	0.091	0.000	5.969
KY18-Core9-169-174	5.881	28.044	98.003	0.000	0.000	0.000	0.000	0.000	0.000	0.000	0.000	0.000	0.000	0.000	0.000	0.000	0.000	0.000	0.000	0.000	0.000	0.000	0.000	0.000	0.000	0.000	0.000	0.000	0.000	0.000	0.000	0.000	0.000	0.000	0.088	0.187	0.363	0.503	0.659	0.826	0.991	0.916	1.580	1.512	1.684	1.857	2.026	1.768	2.767
KY18-Pit1-5	44.263	216.314	436.112	0.000	0.000	0.000	0.000	0.000	0.000	0.000	0.000	0.000	0.000	0.000	0.000	0.000	0.000	0.000	0.000	0.000	0.000	0.000	0.000	0.000	0.000	0.000	0.000	0.000	0.000	0.000	0.000	0.000	0.000	0.000	0.000	0.018	0.067	0.089	0.115	0.143	0.168	0.153	0.260	0.243	0.264	0.283	0.298	0.251	0.374
KY18-Pit2-10	9.351	70.664	162.067	0.000	0.000	0.000	0.000	0.000	0.000	0.000	0.000	0.000	0.000	0.000	0.000	0.000	0.000	0.000	0.000	0.000	0.000	0.000	0.000	0.000	0.000	0.000	0.000	0.000	0.000	0.000	0.000	0.000	0.000	0.000	0.063	0.124	0.217	0.288	0.365	0.448	0.529	0.486	0.835	0.799	0.890	0.983	1.071	0.930	1.438
KY18-Pit4-20	14.592	80.758	183.209	0.000	0.000	0.000	0.000	0.000	0.000	0.000	0.000	0.000	0.000	0.000	0.000	0.000	0.000	0.000	0.000	0.000	0.000	0.000	0.000	0.000	0.000	0.000	0.000	0.000	0.000	0.000	0.000	0.000	0.000	0.000	0.038	0.076	0.138	0.183	0.232	0.284	0.335	0.307	0.528	0.506	0.567	0.630	0.692	0.606	0.948
KY18-Pit5-20	6.031	24.262	74.274	0.000	0.000	0.000	0.000	0.000	0.000	0.000	0.000	0.000	0.000	0.000	0.000	0.000	0.000	0.000	0.000	0.000	0.000	0.000	0.000	0.000	0.000	0.000	0.000	0.000	0.000	0.000	0.000	0.000	0.000	0.000	0.087	0.186	0.361	0.491	0.635	0.787	0.937	0.865	1.496	1.446	1.634	1.836	2.049	1.830	2.946
KY18-Pit6-60	11.787	90.390	412.667	0.000	0.000	0.000	0.000	0.000	0.000	0.000	0.000	0.000	0.000	0.000	0.000	0.000	0.000	0.000	0.000	0.000	0.000	0.000	0.000	0.000	0.000	0.000	0.000	0.000	0.000	0.000	0.000	0.000	0.000	0.000	0.041	0.087	0.167	0.229	0.297	0.368	0.438	0.401	0.685	0.648	0.713	0.776	0.834	0.717	1.104
KY18-Pit8-40	6.748	32.250	88.149	0.000	0.000	0.000	0.000	0.000	0.000	0.000	0.000	0.000	0.000	0.000	0.000	0.000	0.000	0.000	0.000	0.000	0.000	0.000	0.000	0.000	0.000	0.000	0.000	0.000	0.000	0.000	0.000	0.000	0.000	0.000	0.073	0.156	0.306	0.420	0.545	0.678	0.807	0.742	1.274	1.217	1.355	1.498	1.641	1.440	2.273
[truncated: 47 more columns]
